# Supplementary material for: Structure of mitochondrial poly(A) RNA polymerase reveals the structural basis for dimerization, ATP selectivity and the SPAX4 disease phenotype
Source: PubMed Central journal article supplement (PMC4605311; doi:10.1093/nar/gkv861), 2015-10-10
Supplement: supp_gkv861_nar-01680-h-2015-File010.pdf [file supp_gkv861_nar-01680-h-2015-File010.pdf]

# **Structure of mitochondrial poly(A) RNA polymerase reveals the structural basis for dimerization, ATP selectivity and the SPAX4 disease phenotype**

## **- Supporting Information -**

Mikalai Lapkouski<sup>a,b</sup> and B. Martin Hällberg<sup>a,b,c,\*</sup>

<sup>a</sup>Department of Cell and Molecular Biology, Karolinska Institutet, 171 77 Stockholm, Sweden

<sup>b</sup>Röntgen-Ångström-Cluster, Karolinska Institutet Outstation, Centre for Structural Systems Biology, DESY-Campus, 22607 Hamburg, Germany

<sup>c</sup>European Molecular Biology Laboratory, Hamburg Unit, 22607 Hamburg, Germany

\* To whom correspondence should be addressed. Tel: +46(0) 852486630; Email: [Martin.Hallberg@ki.se](mailto:Martin.Hallberg@ki.se)

Supplementary Figure S1

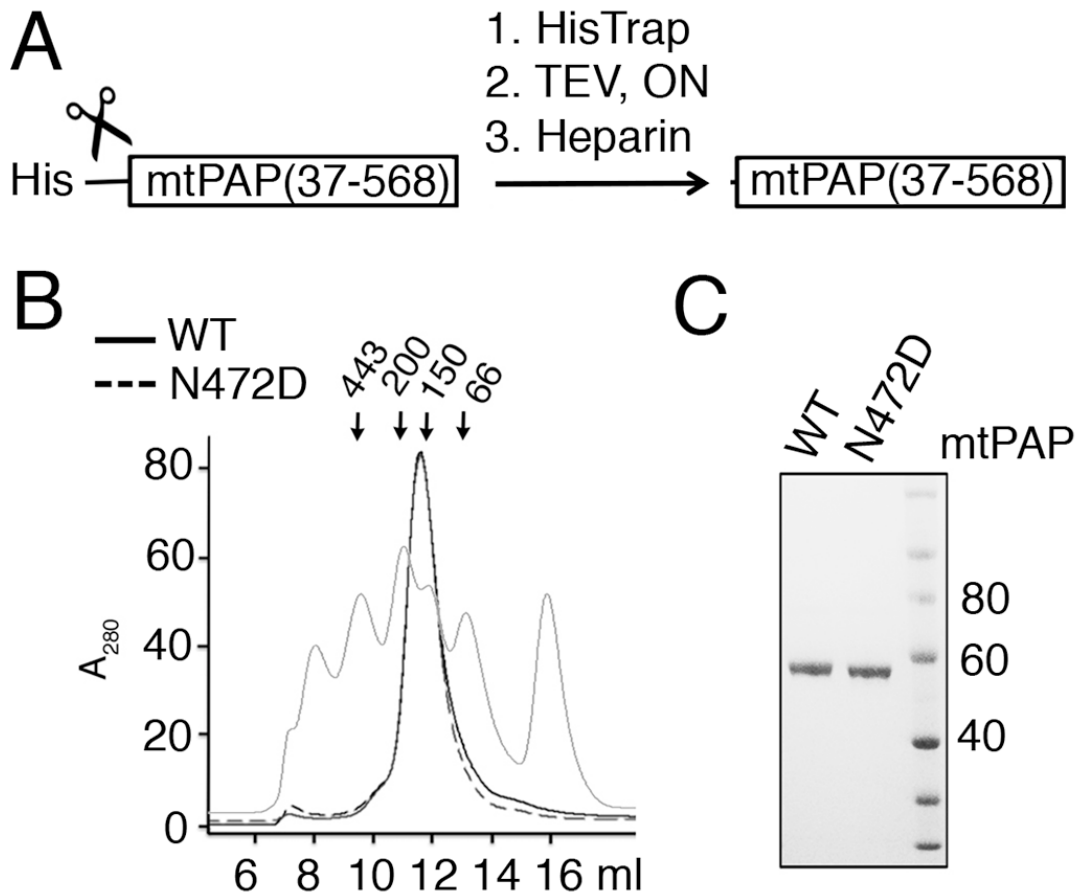

**Supplementary Figure S1.** Purification and activity of mtPAP proteins. **(A)** Diagram of the mtPAP construct used in this study. WT (37-568) and N472D mtPAPs were fused to a TEV protease-cleavable N-terminal His-tag and purified using a HisTrap affinity column, followed by overnight His-tag removal and a final purification over a heparin column. D372N mutant was purified the same way. **(B)** Superdex 200 10/300 gel-filtration profile of WT and N472D mutant mtPAP after purification steps shown in (A). Arrows indicate the elution points of molecular mass markers (443, 200, 150, and 66 kDa). **(C)** Protein purity shown by an SDS gel of the size-exclusion peaks from (B).

## Supplementary Figure S2

mtPAP structure

|              |              |               |              |                 |                  |            |
|--------------|--------------|---------------|--------------|-----------------|------------------|------------|
|              | 1            | 10            | 20           | 30              | 40               | 50         |
| F1NBW0_CHICK | MAQRAGGRA... | LCLLR.GR..... | LLPFGPAAAR   | LGSSGPALQRAGGAE | ETDAEVSARK       |            |
| Q9NVV4_HUMAN | MAVPGVGLL    | TRLNLCAARR    | RTRVQRPIVRL  | LSCPGTVAKD      | LRRD...EQPSSGSV  | ETGFEDKIPK |
| Q9D0D3_MOUSE | MAARGVGLL    | TRLPVCSQR     | RNRIPRSISRLL | LSCPGTIAAS      | IGSE...EQSSVVAE  | ETGIEDKTLQ |
| F1MSM5_BOVIN | MAACSVGLL    | TRLRLRVQR     | .SQVQRPLRRL  | LSCPGTVAAD      | LRRRE...EQSSGSAE | ETGSEDRTPK |
| E2RCU9_CANFA | MAARRVGLL    | ARLLCAQR      | .SQVLRPTHRL  | LSCPGTVAAD      | VKRE...EQSSRSV   | ETDSEDRTPK |
| F7A152_XENTR | .....        | .....         | .....        | .....           | .....            | EDPVTRE    |

mtPAP structure

|              |             |            |        |         |         |         |        |        |              |
|--------------|-------------|------------|--------|---------|---------|---------|--------|--------|--------------|
| F1NBW0_CHICK | KTFTEVQTERI | EQADRSVLIK | CPSKLN | ENKLLQV | LSHSGK  | IDNYFF  | ENRGI  | HALIEF | SEKSSV       |
| Q9NVV4_HUMAN | RRFSEMNER   | EQQRVTL    | HCPEK  | ISENKFL | KYLSQ   | FGPINNH | FFYES  | FGLYAV | VEFCQKESI    |
| Q9D0D3_MOUSE | KKFSEVQER   | EQQRVTL    | HCPEK  | ISENKFL | KYLSQ   | FGPINNH | FFYES  | FGLYAV | VEFCQKESI    |
| F1MSM5_BOVIN | KKFSEVQER   | EQQRVTL    | HCPEK  | ISENKFL | KYLSQ   | FGPINNH | FFYES  | FGLYAV | VEFCQKESI    |
| E2RCU9_CANFA | KKFSEVQER   | EQQRVTL    | HCPEK  | ISENKFL | KYLSQ   | FGPINNH | FFYES  | FGLYAV | VEFCQKESI    |
| F7A152_XENTR | RTFAEVQER   | EQQKHV     | VLINCP | PNVNE   | KFLKYLS | QHGQ    | ITRHHF | YEGYGA | HAVVEFLDRESI |

mtPAP structure

|              |           |         |         |        |        |         |        |         |        |       |
|--------------|-----------|---------|---------|--------|--------|---------|--------|---------|--------|-------|
| F1NBW0_CHICK | ASLQAVTGI | PKAAEHH | VVPYKSR | LFTFTL | LKNPGS | QAAEERP | VKISPO | SHIPVNE | LIPKLC | HADS  |
| Q9NVV4_HUMAN | GSLQNGTHT | PTSTAM  | ETAIPFR | SRRFNL | LKLNQ  | .TSE    | RSRVR  | SNQL    | PRSNK  | OLFEL |
| Q9D0D3_MOUSE | KSLQNGTHT | PTQST   | EAAIPF  | KSRFLN | LRLLK  | PNSS    | QVSG   | QPFV    | QTIN   | QSPSS |
| F1MSM5_BOVIN | TSLQNI    | TRTPSL  | GLPEAA  | IPFKSR | YLN    | LRLN    | SLN    | QTS     | ELSSI  | QCNS  |
| E2RCU9_CANFA | TSLQNI    | TRTPS   | MDTEAA  | IPFKSR | YLN    | KMK     | PNSS   | QTS     | ELSSI  | QCNS  |
| F7A152_XENTR | ESLRSATSL | PTVEN   | ECIIPF  | KSRFL  | TLKSD  | SAL     | .GNV   | VP      | CHR    | OTAL  |

mtPAP structure

|              |          |       |       |       |       |       |        |       |       |      |      |      |      |     |
|--------------|----------|-------|-------|-------|-------|-------|--------|-------|-------|------|------|------|------|-----|
| F1NBW0_CHICK | ISSOMYI  | LLNEY | QOLTE | ENIKL | RYLAC | SLVDF | FARAY  | FPDST | VKPF  | GSSV | NTFG | KLGD | VDM  | FLD |
| Q9NVV4_HUMAN | IDDQLNT  | LLKEF | OLTE  | ENTK  | LRYL  | TCSL  | IEDMA  | AAAY  | FPDCI | VRPF | GSSV | NTFG | KLGD | LDM |
| Q9D0D3_MOUSE | IEEQLNT  | LLKAF | OLTE  | ENIR  | LRHL  | TCSL  | IEDIA  | AAAY  | FPDCV | IRPF | GSSV | NTFG | KLGD | LDM |
| F1MSM5_BOVIN | VDDQLNT  | LLREF | OLTE  | ENIR  | LRHL  | TCSL  | IEDIA  | AAAY  | FPDCV | IRPF | GSSV | NTFG | KLGD | LDM |
| E2RCU9_CANFA | IDDQLNT  | LLKEF | OLTE  | ENIKL | RYL   | TCSL  | IEDIA  | AAAY  | FPDCV | IRPF | GSSV | NTFG | KLGD | LDM |
| F7A152_XENTR | IEEQAYAL | LEEQ  | OLTE  | ENIR  | LRFL  | VSLIK | DIATAY | FPFAT | VNPM  | GSTV | NVNS | FGKL | GCDL | LDL |

mtPAP structure

|              |         |        |      |     |     |     |    |     |      |      |     |     |     |     |     |     |     |     |      |      |
|--------------|---------|--------|------|-----|-----|-----|----|-----|------|------|-----|-----|-----|-----|-----|-----|-----|-----|------|------|
| F1NBW0_CHICK | FHDIQKH | HATKMK | KKGF | EM  | EYQ | MKR | LP | SER | IATQ | KIL  | SI  | IGD | CLD | NFG | PGY | SVQ | KIL | NAR | CPLV |      |
| Q9NVV4_HUMAN | LDETRN  | LSAHK  | ISGN | FL  | ME  | FQV | KN | VP  | SER  | IATQ | KIL | SV  | IGD | CLD | NFG | PGY | SVQ | KIL | NAR  | CPLV |
| Q9D0D3_MOUSE | LDETRN  | LSAHK  | ISGN | FL  | ME  | FQV | KN | VP  | SER  | IATQ | KIL | SV  | IGD | CLD | NFG | PGY | SVQ | KIL | NAR  | CPLV |
| F1MSM5_BOVIN | LDETRN  | LSAHK  | ISGN | FL  | ME  | FQV | KN | VP  | SER  | IATQ | KIL | SV  | IGD | CLD | NFG | PGY | SVQ | KIL | NAR  | CPLV |
| E2RCU9_CANFA | LDETRN  | LSAHK  | ISGN | FL  | ME  | FQV | KN | VP  | SER  | IATQ | KIL | SV  | IGD | CLD | NFG | PGY | SVQ | KIL | NAR  | CPLV |
| F7A152_XENTR | LDDIQK  | RIAVK  | TGPF | ATE | YLI | KRV | PS | AR  | VATQ | RI   | LS  | VIG | E   | CID | NFG | PGY | CTG | VQK | I    | L    |

mtPAP structure

|              |    |     |   |    |   |   |   |   |   |   |   |   |   |   |   |   |   |   |   |   |   |   |   |   |   |   |   |   |   |   |   |   |   |   |   |   |   |   |   |   |   |   |   |   |   |   |   |   |   |   |   |   |   |   |   |   |   |   |   |   |   |   |   |   |
|--------------|----|-----|---|----|---|---|---|---|---|---|---|---|---|---|---|---|---|---|---|---|---|---|---|---|---|---|---|---|---|---|---|---|---|---|---|---|---|---|---|---|---|---|---|---|---|---|---|---|---|---|---|---|---|---|---|---|---|---|---|---|---|---|---|---|
| F1NBW0_CHICK | KF | SHQ | P | TG | F | Q | C | D | L | S | V | S | N | S | I | A | I | R | C | S | E | L | L | Y | I | Y | G | C | L | D | P | R | V | R | A | L | V | F | S | L | R | C | W | A | R | V | H | G | L | T | N | S | V | P | G | T | W | I | T | N |   |   |   |   |
| Q9NVV4_HUMAN | R  | F   | S | H  | Q | A | S | G | F | Q | C | D | L | T | T | N | N | R | I | A | L | T | S | S | E | L | L | Y | I | Y | G | A | L | D | S | R | V | R | A | L | V | F | S | V | R | C | W | A | R | A | H | S | L | T | S | S | I | P | G | A | W | I | T | N |
| Q9D0D3_MOUSE | R  | F   | S | H  | Q | S | G | F | Q | C | D | L | T | A | N | N | S | I | A | L | K | S | S | E | L | L | Y | I | Y | G | S | L | D | S | R | V | R | A | L | V | F | S | V | R | C | W | A | R | A | H | S | L | T | S | S | I | P | G | A | W | I | T | N |   |
| F1MSM5_BOVIN | R  | F   | S | H  | Q | A | S | G | F | Q | C | D | L | T | T | N | N | R | I | A | L | K | S | S | E | L | L | Y | I | Y | G | A | L | D | S | R | V | R | A | L | V | F | S | V | R | C | W | A | R | A | H | S | L | T | S | S | I | P | G | A | W | I | T | N |
| E2RCU9_CANFA | R  | F   | S | H  | Q | A | S | G | F | Q | C | D | L | T | T | N | N | R | I | A | L | K | S | S | E | L | L | Y | I | Y | G | A | L | D | S | R | V | R | A | L | V | F | S | V | R | C | W | A | R | A | H | S | L | T | S | S | I | P | G | A | W | I | T | N |
| F7A152_XENTR | R  | F   | S | H  | Q | P | A | G | I | Q | C | D | L | T | S | D | N | R | I | A | L | R | S | S | E | L | L | Y | I | Y | G | C | F | D | H | R | L | R | A | L | V | F | T | L | R | C | W | A | R | V | H | G | I | T | S | A | I | P | G | A | W | I | T | N |

mtPAP structure

|              |   |   |   |   |   |   |   |   |   |   |   |   |   |   |   |   |   |   |   |   |   |   |   |   |   |   |   |   |   |   |   |   |   |   |   |   |   |   |   |   |   |   |   |   |   |   |   |   |   |   |   |   |   |   |   |   |   |   |   |   |   |   |
|--------------|---|---|---|---|---|---|---|---|---|---|---|---|---|---|---|---|---|---|---|---|---|---|---|---|---|---|---|---|---|---|---|---|---|---|---|---|---|---|---|---|---|---|---|---|---|---|---|---|---|---|---|---|---|---|---|---|---|---|---|---|---|---|
| F1NBW0_CHICK | F | S | L | T | M | M | I | F | F | L | Q | R | S | P | P | I | P | T | L | D | Q | L | K | E | L | A | D | E | K | D | K | H | V | I | G | C | Y | D | C | S | F | V | S | D | L | S | K | I | K | P | T | K | N | T | E | L | D | E | L |   |   |   |
| Q9NVV4_HUMAN | F | S | L | T | M | M | V | I | F | F | L | Q | R | S | P | P | I | P | T | L | D | S | L | K | T | L | A | D | E | D | K | C | V | I | E | G | N | N | C | T | F | V | R | D | L | S | R | I | K | P | S | O | N | T | E | L | L | L |   |   |   |   |
| Q9D0D3_MOUSE | F | S | L | T | V | M | V | I | F | F | L | Q | R | S | P | P | I | P | T | L | D | S | L | K | T | L | A | D | E | D | K | C | I | L | E | G | N | N | C | T | F | V | Q | D | V | N | K | I | Q | P | S | G | N | T | E | L | L | L |   |   |   |   |
| F1MSM5_BOVIN | F | S | L | T | M | M | V | I | F | F | L | Q | R | S | P | P | I | P | T | L | D | Y | L | K | T | L | A | D | E | D | K | C | I | I | E | G | H | N | C | T | F | V | G | D | L | N | R | I | K | P | S | R | N | T | E | L | L | L |   |   |   |   |
| E2RCU9_CANFA | F | S | L | T | M | M | V | I | F | F | L | Q | R | S | P | P | I | P | T | L | D | Y | L | K | T | L | A | D | E | D | K | C | I | I | E | G | H | N | C | T | F | I | R | D | L | N | R | I | K | P | S | G | N | T | E | L | L |   |   |   |   |   |
| F7A152_XENTR | F | S | L | T | M | M | I | L | F | F | L | Q | R | S | P | P | V | I | P | T | L | D | H | L | K | G | L | A | G | K | E | D | K | H | I | I | D | C | H | D | C | S | F | V | S | N | L | N | R | I | K | P | S | O | N | S | E | A | L | D | V | L |





Supplementary Figure S3

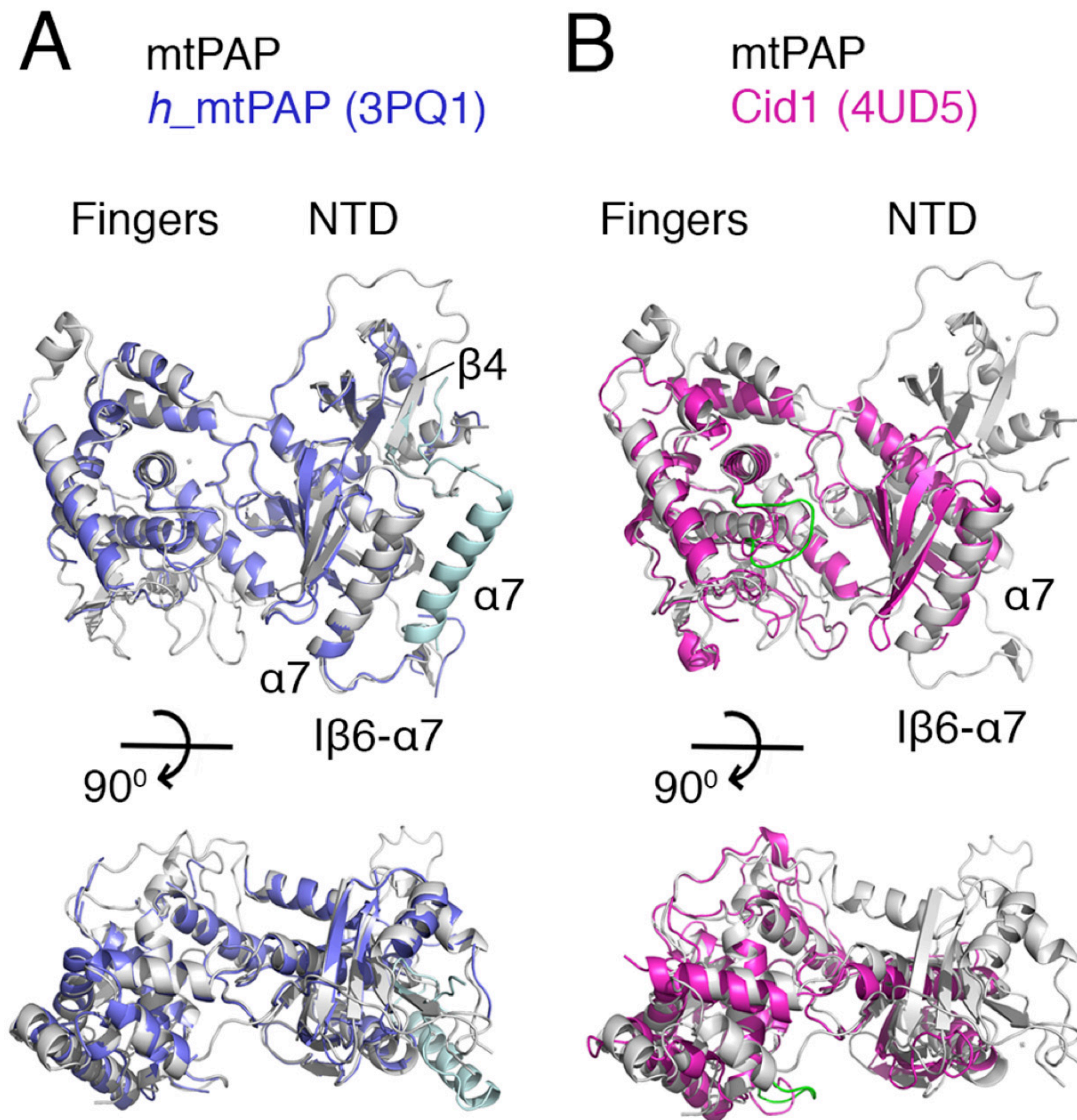

**Supplementary Figure S3.** Structural similarities of mtPAP. **(A)** Orthogonal view of the superposition of the domains of mtPAP (grey) and human mtPAP (blue) (PDB: 3PQ1). The  $\alpha 7$  of the palm domain of human mtPAP for the second monomer is colored cyan. **(B)** Orthogonal view of the superposition of the domains of mtPAP (grey) and yeast Cid1 (red) (PDB: 4UD5). mtPAP domains are labeled and the palm-domain insertion unique to mtPAP is indicated. The loop between  $\alpha 9-\alpha 10$  in mtPAP is colored green to highlight its different position from that in Cid1.
